# Supplementary material
Source: HighWire-hosted journal article supplement (https://bmjopen.bmj.com/content/15/3/e088867)
Supplement: inline-supplementary-material-4 [file inline-supplementary-material-4.pdf]

# Obsidian ASG Autologous Platelet-Rich Fibrin Matrix for the prevention of postoperative pancreatic fistula following pancreatic resection: study protocol for a feasibility trial

## CASE REPORT FORM

**Principal Investigator**

Prof. Dr.med Oliver Strobel

**Investigators**

PD Dr. med. Ulla Klaiber

Dr. med. Charlotte Gustorff

KKS - Clinical Trials Coordination Centre

Währinger Straße 25a, OG 1

1090 Vienna Austria

Tel.: +43 (0)1 40160 - 25176

kks@meduniwien.ac.at

Division of Visceral Surgery, Department of General Surgery

Medical University of Vienna

Währinger Gürtel 18-20

1090 Vienna, Austria

Obsidian-Pilottrial

Visit 1: Screening/Enrolment

Screening No.: \_\_\_\_\_

Year of birth: \_\_\_\_\_

Date of screening: \_\_\_\_\_ (dd/mm/yyyy)

| Inclusion criteria                                                          | yes                   | no                    |
|-----------------------------------------------------------------------------|-----------------------|-----------------------|
| 1. Age ≥18 years                                                            | <input type="radio"/> | <input type="radio"/> |
| 2. Patient undergoing elective partial pancreatic resection for any reason  | <input type="radio"/> | <input type="radio"/> |
| 3. Ability to understand character and individual consequences of the trial | <input type="radio"/> | <input type="radio"/> |
| 4. Written informed consent                                                 | <input type="radio"/> | <input type="radio"/> |
| 5. Date of written informed consent:                                        | <input type="radio"/> | <input type="radio"/> |

| Exclusion criteria                                                   | yes                   | no                    |
|----------------------------------------------------------------------|-----------------------|-----------------------|
| 1. ASA score > III                                                   | <input type="radio"/> | <input type="radio"/> |
| 2. Pregnancy or lactation                                            | <input type="radio"/> | <input type="radio"/> |
| 3. Understanding or language problems                                | <input type="radio"/> | <input type="radio"/> |
| 4. Inability to comply with study and/or follow-up procedures        | <input type="radio"/> | <input type="radio"/> |
| 5. Known hypersensitivity to any component of the formulation        | <input type="radio"/> | <input type="radio"/> |
| 6. Concurrent participation in another interventional clinical trial | <input type="radio"/> | <input type="radio"/> |

Demography

Gender ☐ female ☐ male ☐ divers

Age: \_\_\_\_\_ years

Anamnesis

Body height and weight: \_\_\_\_\_ cm \_\_\_\_\_ kg

Previous abdominal surgery

Previous radio-/chemotherapy within the last 6 months

Relevant comorbidities:

-

Coronary heart disease☐

-

Congestive heart failure NYHA I/II☐

-

Chronic atrial fibrillation☐

-

Chronic renal insufficiency☐

-

Chronic obstructive pulmonary disease (COPD)☐

-

Diabetes mellitus ☐

-

Other:☐ \_\_\_\_\_

ASA-classification: ☐ I (healthy patient)☐ II (mild systemic disease)  
☐ III (severe systemic disease)

Pancreas-specific anamnesis

Indication for the planned surgical procedure

-

Pancreatic carcinoma

-

Cystic neoplasm

-

Neuroendocrine tumor

-

Other: \_\_\_\_\_

If preexisting diabetes mellitus, insulin dependent? Yes ☐ no ☐

Preexisting exocrine pancreatic insufficiency? Yes ☐ no ☐

○

|                                                                                                                                                                                                                                                                                                                     |  |                           |
|---------------------------------------------------------------------------------------------------------------------------------------------------------------------------------------------------------------------------------------------------------------------------------------------------------------------|--|---------------------------|
| <h1>Obsidian-Pilottrial</h1>                                                                                                                                                                                                                                                                                        |  | <h2>Visit 2: Surgery</h2> |
| Screening No.: _____                                                                                                                                                                                                                                                                                                |  | Year of birth: _____      |
| Date of surgery _____                                                                                                                                                                                                                                                                                               |  |                           |
| Performed surgery<br>- DP <input type="checkbox"/> PD <input type="checkbox"/> other <input type="checkbox"/> _____                                                                                                                                                                                                 |  |                           |
| Approach<br>- Laparoscopic <input type="checkbox"/> robotic <input type="checkbox"/> open <input type="checkbox"/><br>- Conversion: no <input type="checkbox"/> yes <input type="checkbox"/> , reason for conversion _____                                                                                          |  |                           |
| Level of pancreatic transection<br>- above <input type="checkbox"/> left to portal vein <input type="checkbox"/> right to portal vein <input type="checkbox"/>                                                                                                                                                      |  |                           |
| Transsection technique: _____                                                                                                                                                                                                                                                                                       |  |                           |
| Closure technique: _____                                                                                                                                                                                                                                                                                            |  |                           |
| Anastomosis technique _____                                                                                                                                                                                                                                                                                         |  |                           |
| Texture of pancreatic tissue:<br>- soft <input type="checkbox"/> intermediate <input type="checkbox"/> hard <input type="checkbox"/>                                                                                                                                                                                |  |                           |
| Pancreatic ducts size: _____ (mm)                                                                                                                                                                                                                                                                                   |  |                           |
| Additional resections: splenectomy <input type="checkbox"/> lymphadenectomy <input type="checkbox"/> others <input type="checkbox"/> _____                                                                                                                                                                          |  |                           |
| Duration from skin incision to closure: _____ min                                                                                                                                                                                                                                                                   |  |                           |
| Intraoperative blood loss: _____ ml                                                                                                                                                                                                                                                                                 |  |                           |
| Intraoperative blood transfusion: _____ ml                                                                                                                                                                                                                                                                          |  |                           |
| Placement of abdominal drain: yes <input type="checkbox"/> no <input type="checkbox"/>                                                                                                                                                                                                                              |  |                           |
| Administration of somatostatin-analogues:<br>- during surgery: yes <input type="checkbox"/> no <input type="checkbox"/><br>- after surgery: yes <input type="checkbox"/> no <input type="checkbox"/>                                                                                                                |  |                           |
| <b>Serious adverse events</b> (new events since last visit)<br>Were there any serious adverse events? Yes <input type="checkbox"/> no <input type="checkbox"/><br>Were there any other intervention related side effects? Yes <input type="checkbox"/> no <input type="checkbox"/><br>If yes, please specify: _____ |  |                           |
| <b>Protocol violations</b><br>Were there any protocol violations? Yes <input type="checkbox"/> no <input type="checkbox"/><br>If yes, please specify: _____                                                                                                                                                         |  |                           |

|                                                                                                                                                                                                                                                                                                                                                                                                                                                                                                                                                                                                                                                                                                                                                          |  |                       |
|----------------------------------------------------------------------------------------------------------------------------------------------------------------------------------------------------------------------------------------------------------------------------------------------------------------------------------------------------------------------------------------------------------------------------------------------------------------------------------------------------------------------------------------------------------------------------------------------------------------------------------------------------------------------------------------------------------------------------------------------------------|--|-----------------------|
| <b>Obsidian-Pilottrial</b>                                                                                                                                                                                                                                                                                                                                                                                                                                                                                                                                                                                                                                                                                                                               |  | <b>Visit 3: POD 3</b> |
| Screening No.: _____                                                                                                                                                                                                                                                                                                                                                                                                                                                                                                                                                                                                                                                                                                                                     |  | Year of birth: _____  |
| Date of visit: _____ (dd/mm/yyyy)                                                                                                                                                                                                                                                                                                                                                                                                                                                                                                                                                                                                                                                                                                                        |  |                       |
| <b>Assessment of postoperative pancreatic fistula</b><br>Pancreatic amylase at POD3: _____ (U/L)<br>Lipase at POD3: _____ (U/L)<br>Classification of POPF: no POPF <input type="checkbox"/> grade A <input type="checkbox"/> grade B <input type="checkbox"/> grade C <input type="checkbox"/>                                                                                                                                                                                                                                                                                                                                                                                                                                                           |  |                       |
| <b>Complications</b> (new events since last visit)<br>Perioperative sepsis <input type="checkbox"/><br>Postpancreatectomy acute pancreatitis <input type="checkbox"/><br>- associated complications (e.g. bleeding or perforation) <input type="checkbox"/> please, specify: _____<br>Delayed gastric emptying<br>Post-pancreatectomy hemorrhage: no PPH <input type="checkbox"/> grade A <input type="checkbox"/> grade B <input type="checkbox"/> grade C <input type="checkbox"/><br>Intraabdominal fluid collection <input type="checkbox"/><br>Intraabdominal abscess <input type="checkbox"/><br>Lymphatic fistula / chylus ascites <input type="checkbox"/><br>Wound infection <input type="checkbox"/><br>Burst abdomen <input type="checkbox"/> |  |                       |
| Reinterventions / - operations <input type="checkbox"/> _____                                                                                                                                                                                                                                                                                                                                                                                                                                                                                                                                                                                                                                                                                            |  |                       |
| ICU stay <input type="checkbox"/><br>Transfer to normal ward at _____. POD                                                                                                                                                                                                                                                                                                                                                                                                                                                                                                                                                                                                                                                                               |  |                       |
| <b>Diagnostics/interventions:</b> yes <input type="checkbox"/> no <input type="checkbox"/><br>CT-scan <input type="checkbox"/><br>Interventional application of drainage <input type="checkbox"/><br>Relaparotomy <input type="checkbox"/> , state the reason: _____                                                                                                                                                                                                                                                                                                                                                                                                                                                                                     |  |                       |
| <b>Serious adverse events</b> (new events since last visit)<br>Were there any serious adverse events? Yes <input type="checkbox"/> no <input type="checkbox"/><br>Were there any other intervention related side effects? Yes <input type="checkbox"/> no <input type="checkbox"/><br>If yes, please specify: _____                                                                                                                                                                                                                                                                                                                                                                                                                                      |  |                       |
| <b>Protocol violations</b><br>Were there any protocol violations? Yes <input type="checkbox"/> no <input type="checkbox"/><br>If yes, please specify: _____                                                                                                                                                                                                                                                                                                                                                                                                                                                                                                                                                                                              |  |                       |

|                                                                                                                                                                                                                                                                                                                                                                                                                                                                                                                                                                                                                                                                                                                                                          |  |                       |
|----------------------------------------------------------------------------------------------------------------------------------------------------------------------------------------------------------------------------------------------------------------------------------------------------------------------------------------------------------------------------------------------------------------------------------------------------------------------------------------------------------------------------------------------------------------------------------------------------------------------------------------------------------------------------------------------------------------------------------------------------------|--|-----------------------|
| <b>Obsidian-Pilottrial</b>                                                                                                                                                                                                                                                                                                                                                                                                                                                                                                                                                                                                                                                                                                                               |  | <b>Visit 4: POD 7</b> |
| Screening No.: _____                                                                                                                                                                                                                                                                                                                                                                                                                                                                                                                                                                                                                                                                                                                                     |  | Year of birth: _____  |
| Date of visit: _____ (dd/mm/yyyy)                                                                                                                                                                                                                                                                                                                                                                                                                                                                                                                                                                                                                                                                                                                        |  |                       |
| <b>Assessment of postoperative pancreatic fistula</b><br>Pancreatic amylase at POD7: _____ (U/L)<br>Lipase at POD7: _____ (U/L)<br>Classification of POPF: no POPF <input type="checkbox"/> grade A <input type="checkbox"/> grade B <input type="checkbox"/> grade C <input type="checkbox"/>                                                                                                                                                                                                                                                                                                                                                                                                                                                           |  |                       |
| <b>Complications</b> (new events since last visit)<br>Perioperative sepsis <input type="checkbox"/><br>Postpancreatectomy acute pancreatitis <input type="checkbox"/><br>- associated complications (e.g. bleeding or perforation) <input type="checkbox"/> please, specify: _____<br>Delayed gastric emptying<br>Post-pancreatectomy hemorrhage: no PPH <input type="checkbox"/> grade A <input type="checkbox"/> grade B <input type="checkbox"/> grade C <input type="checkbox"/><br>Intraabdominal fluid collection <input type="checkbox"/><br>Intraabdominal abscess <input type="checkbox"/><br>Lymphatic fistula / chylus ascites <input type="checkbox"/><br>Wound infection <input type="checkbox"/><br>Burst abdomen <input type="checkbox"/> |  |                       |
| Reinterventions / - operations <input type="checkbox"/> _____                                                                                                                                                                                                                                                                                                                                                                                                                                                                                                                                                                                                                                                                                            |  |                       |
| ICU stay <input type="checkbox"/><br>Transfer to normal ward at _____. POD                                                                                                                                                                                                                                                                                                                                                                                                                                                                                                                                                                                                                                                                               |  |                       |
| <b>Diagnostics/interventions:</b> yes <input type="checkbox"/> no <input type="checkbox"/><br>CT-scan <input type="checkbox"/><br>Interventional application of drainage <input type="checkbox"/><br>Relaparotomy <input type="checkbox"/> , state the reason: _____                                                                                                                                                                                                                                                                                                                                                                                                                                                                                     |  |                       |
| <b>Serious adverse events</b> (new events since last visit)<br>Were there any serious adverse events? Yes <input type="checkbox"/> no <input type="checkbox"/><br>Were there any other intervention related side effects? Yes <input type="checkbox"/> no <input type="checkbox"/><br>If yes, please specify: _____                                                                                                                                                                                                                                                                                                                                                                                                                                      |  |                       |
| <b>Protocol violations</b><br>Were there any protocol violations? Yes <input type="checkbox"/> no <input type="checkbox"/><br>If yes, please specify: _____                                                                                                                                                                                                                                                                                                                                                                                                                                                                                                                                                                                              |  |                       |

|                                                                                                                                                                    |  |                                         |
|--------------------------------------------------------------------------------------------------------------------------------------------------------------------|--|-----------------------------------------|
| <b>Obsidian-Pilottrial</b>                                                                                                                                         |  | <b>Visit 5: POD 14/day of discharge</b> |
| Screening No.: _____                                                                                                                                               |  | Year of birth: _____                    |
| Date of visit: _____ (dd/mm/yyyy)                                                                                                                                  |  |                                         |
| <b>Assessment of postoperative pancreatic fistula</b>                                                                                                              |  |                                         |
| Classification of POPF: no POPF <input type="checkbox"/> grade A <input type="checkbox"/> grade B <input type="checkbox"/> grade C <input type="checkbox"/>        |  |                                         |
| <b>Complications</b> (new events since last visit)                                                                                                                 |  |                                         |
| Perioperative sepsis <input type="checkbox"/>                                                                                                                      |  |                                         |
| Postpancreatectomy acute pancreatitis <input type="checkbox"/>                                                                                                     |  |                                         |
| - associated complications (e.g. bleeding or perforation) <input type="checkbox"/> please, specifiy: _____                                                         |  |                                         |
| Delayed gastric emptying                                                                                                                                           |  |                                         |
| Post-pancreatectomy hemorrhage: no PPH <input type="checkbox"/> grade A <input type="checkbox"/> grade B <input type="checkbox"/> grade C <input type="checkbox"/> |  |                                         |
| Intraabdominal fluid collection <input type="checkbox"/>                                                                                                           |  |                                         |
| Intraabdominal abscess <input type="checkbox"/>                                                                                                                    |  |                                         |
| Lymphatic fistula / chylus ascites <input type="checkbox"/>                                                                                                        |  |                                         |
| Wound infection <input type="checkbox"/>                                                                                                                           |  |                                         |
| Burst abdomen <input type="checkbox"/>                                                                                                                             |  |                                         |
| Reinterventions / - operations <input type="checkbox"/> _____                                                                                                      |  |                                         |
| ICU stay <input type="checkbox"/>                                                                                                                                  |  |                                         |
| Transfer to normal ward at _____. POD                                                                                                                              |  |                                         |
| <b>Diagnostics/interventions:</b> yes <input type="checkbox"/> no <input type="checkbox"/>                                                                         |  |                                         |
| CT-scan <input type="checkbox"/>                                                                                                                                   |  |                                         |
| Interventional application of drainage <input type="checkbox"/>                                                                                                    |  |                                         |
| Relaparotomy <input type="checkbox"/> , state the reason: _____                                                                                                    |  |                                         |
| <b>Serious adverse events</b> (new events since last visit)                                                                                                        |  |                                         |
| Were there any serious adverse events? Yes <input type="checkbox"/> no <input type="checkbox"/>                                                                    |  |                                         |
| Were there any other intervention related side effects? Yes <input type="checkbox"/> no <input type="checkbox"/>                                                   |  |                                         |
| If yes, please specify: _____                                                                                                                                      |  |                                         |
| <b>Protocol violations</b>                                                                                                                                         |  |                                         |
| Were there any protocol violations? Yes <input type="checkbox"/> no <input type="checkbox"/>                                                                       |  |                                         |
| If yes, please specify: _____                                                                                                                                      |  |                                         |

|                                                                                                                                                                    |  |                        |
|--------------------------------------------------------------------------------------------------------------------------------------------------------------------|--|------------------------|
| <b>Obsidian-Pilottrial</b>                                                                                                                                         |  | <b>Visit 6: POD 30</b> |
| Screening No.: _____                                                                                                                                               |  | Year of birth: _____   |
| Date of visit: _____ (dd/mm/yyyy)                                                                                                                                  |  |                        |
| <b>Assessment of postoperative pancreatic fistula</b>                                                                                                              |  |                        |
| Classification of POPF: no POPF <input type="checkbox"/> grade A <input type="checkbox"/> grade B <input type="checkbox"/> grade C <input type="checkbox"/>        |  |                        |
| <b>Complications</b> (new events since last visit)                                                                                                                 |  |                        |
| Perioperative sepsis <input type="checkbox"/>                                                                                                                      |  |                        |
| Postpancreatectomy acute pancreatitis <input type="checkbox"/>                                                                                                     |  |                        |
| - associated complications (e.g. bleeding or perforation) <input type="checkbox"/> please, specifiy: _____                                                         |  |                        |
| Delayed gastric emptying                                                                                                                                           |  |                        |
| Post-pancreatectomy hemorrhage: no PPH <input type="checkbox"/> grade A <input type="checkbox"/> grade B <input type="checkbox"/> grade C <input type="checkbox"/> |  |                        |
| Intraabdominal fluid collection <input type="checkbox"/>                                                                                                           |  |                        |
| Intraabdominal abscess <input type="checkbox"/>                                                                                                                    |  |                        |
| Lymphatic fistula / chylus ascites <input type="checkbox"/>                                                                                                        |  |                        |
| Wound infection <input type="checkbox"/>                                                                                                                           |  |                        |
| Burst abdomen <input type="checkbox"/>                                                                                                                             |  |                        |
| Reinterventions / - operations <input type="checkbox"/> _____                                                                                                      |  |                        |
| ICU stay <input type="checkbox"/>                                                                                                                                  |  |                        |
| Transfer to normal ward at _____. POD                                                                                                                              |  |                        |
| <b>Diagnostics/interventions:</b> yes <input type="checkbox"/> no <input type="checkbox"/>                                                                         |  |                        |
| CT-scan <input type="checkbox"/>                                                                                                                                   |  |                        |
| Interventional application of drainage <input type="checkbox"/>                                                                                                    |  |                        |
| Relaparotomy <input type="checkbox"/> , state the reason: _____                                                                                                    |  |                        |
| <b>Serious adverse events</b> (new events since last visit)                                                                                                        |  |                        |
| Were there any serious adverse events? Yes <input type="checkbox"/> no <input type="checkbox"/>                                                                    |  |                        |
| Were there any other intervention related side effects? Yes <input type="checkbox"/> no <input type="checkbox"/>                                                   |  |                        |
| If yes, please specify: _____                                                                                                                                      |  |                        |
| <b>Protocol violations</b>                                                                                                                                         |  |                        |
| Were there any protocol violations? Yes <input type="checkbox"/> no <input type="checkbox"/>                                                                       |  |                        |
| If yes, please specify: _____                                                                                                                                      |  |                        |

|                                                                                                                                                                                                                                                                                                                                                                                                                                                                                                                                                                                                                                                                                                                                                          |  |                                                          |
|----------------------------------------------------------------------------------------------------------------------------------------------------------------------------------------------------------------------------------------------------------------------------------------------------------------------------------------------------------------------------------------------------------------------------------------------------------------------------------------------------------------------------------------------------------------------------------------------------------------------------------------------------------------------------------------------------------------------------------------------------------|--|----------------------------------------------------------|
| <b>Obsidian-Pilottrial</b>                                                                                                                                                                                                                                                                                                                                                                                                                                                                                                                                                                                                                                                                                                                               |  | <b>Visit 7: POD 90 /<br/>premature study termination</b> |
| Screening No.: _____                                                                                                                                                                                                                                                                                                                                                                                                                                                                                                                                                                                                                                                                                                                                     |  | Year of birth: _____                                     |
| Date of visit: _____ (dd/mm/yyyy)                                                                                                                                                                                                                                                                                                                                                                                                                                                                                                                                                                                                                                                                                                                        |  |                                                          |
| <b>Assessment of postoperative pancreatic fistula</b><br>Lipase at POD3: _____ (U/L)<br>Classification of POPF: no POPF <input type="checkbox"/> grade A <input type="checkbox"/> grade B <input type="checkbox"/> grade C <input type="checkbox"/>                                                                                                                                                                                                                                                                                                                                                                                                                                                                                                      |  |                                                          |
| <b>Complications</b> (new events since last visit)<br>Perioperative sepsis <input type="checkbox"/><br>Postpancreatectomy acute pancreatitis <input type="checkbox"/><br>- associated complications (e.g. bleeding or perforation) <input type="checkbox"/> please, specify: _____<br>Delayed gastric emptying<br>Post-pancreatectomy hemorrhage: no PPH <input type="checkbox"/> grade A <input type="checkbox"/> grade B <input type="checkbox"/> grade C <input type="checkbox"/><br>Intraabdominal fluid collection <input type="checkbox"/><br>Intraabdominal abscess <input type="checkbox"/><br>Lymphatic fistula / chylus ascites <input type="checkbox"/><br>Wound infection <input type="checkbox"/><br>Burst abdomen <input type="checkbox"/> |  |                                                          |
| Reinterventions / - operations <input type="checkbox"/> _____                                                                                                                                                                                                                                                                                                                                                                                                                                                                                                                                                                                                                                                                                            |  |                                                          |
| ICU stay <input type="checkbox"/><br>Transfer to normal ward at _____. POD                                                                                                                                                                                                                                                                                                                                                                                                                                                                                                                                                                                                                                                                               |  |                                                          |
| <b>Diagnostics/interventions:</b> yes <input type="checkbox"/> no <input type="checkbox"/><br>CT-scan <input type="checkbox"/><br>Interventional application of drainage <input type="checkbox"/><br>Relaparotomy <input type="checkbox"/> , state the reason: _____                                                                                                                                                                                                                                                                                                                                                                                                                                                                                     |  |                                                          |
| <b>Serious adverse events</b> (new events since last visit)<br>Were there any serious adverse events? Yes <input type="checkbox"/> no <input type="checkbox"/><br>Were there any other intervention related side effects? Yes <input type="checkbox"/> no <input type="checkbox"/><br>If yes, please specify: _____                                                                                                                                                                                                                                                                                                                                                                                                                                      |  |                                                          |
| <b>Protocol violations</b><br>Were there any protocol violations? Yes <input type="checkbox"/> no <input type="checkbox"/><br>If yes, please specify: _____                                                                                                                                                                                                                                                                                                                                                                                                                                                                                                                                                                                              |  |                                                          |
| <b>Hospitalization</b><br>Date of discharge: _____ or hospital stay ongoing <input type="checkbox"/><br>Total intensive care unit stay (postoperative and readmissions): ____ (days)<br>Total hospital stay: ____ (days)                                                                                                                                                                                                                                                                                                                                                                                                                                                                                                                                 |  |                                                          |
| <b>Results from final histological examination</b><br>Pancreatic carcinoma <input type="checkbox"/><br>- if yes, please enter pTNM-stage: _____<br>Cystic neoplasm <input type="checkbox"/><br>Neuroendocrine tumor <input type="checkbox"/><br>Other <input type="checkbox"/> _____                                                                                                                                                                                                                                                                                                                                                                                                                                                                     |  |                                                          |
| I confirm that all data entered in this CRF is complete and accurate to the                                                                                                                                                                                                                                                                                                                                                                                                                                                                                                                                                                                                                                                                              |  |                                                          |



best of my knowledge.

X

date, investigator's name (block letters)
